# Supplementary material for: Ibrutinib synergizes with MDM-2 inhibitors in promoting cytotoxicity in B chronic lymphocytic leukemia
Source: PubMed Central journal article supplement (PMC5342579; doi:10.18632/oncotarget.12139), 2016-09-20
Supplement: oncotarget-07-70623-s001.pdf [file oncotarget-07-70623-s001.pdf]

## Ibrutinib synergizes with MDM-2 inhibitors in promoting cytotoxicity in B chronic lymphocytic leukemia

### SUPPLEMENTARY FIGURE

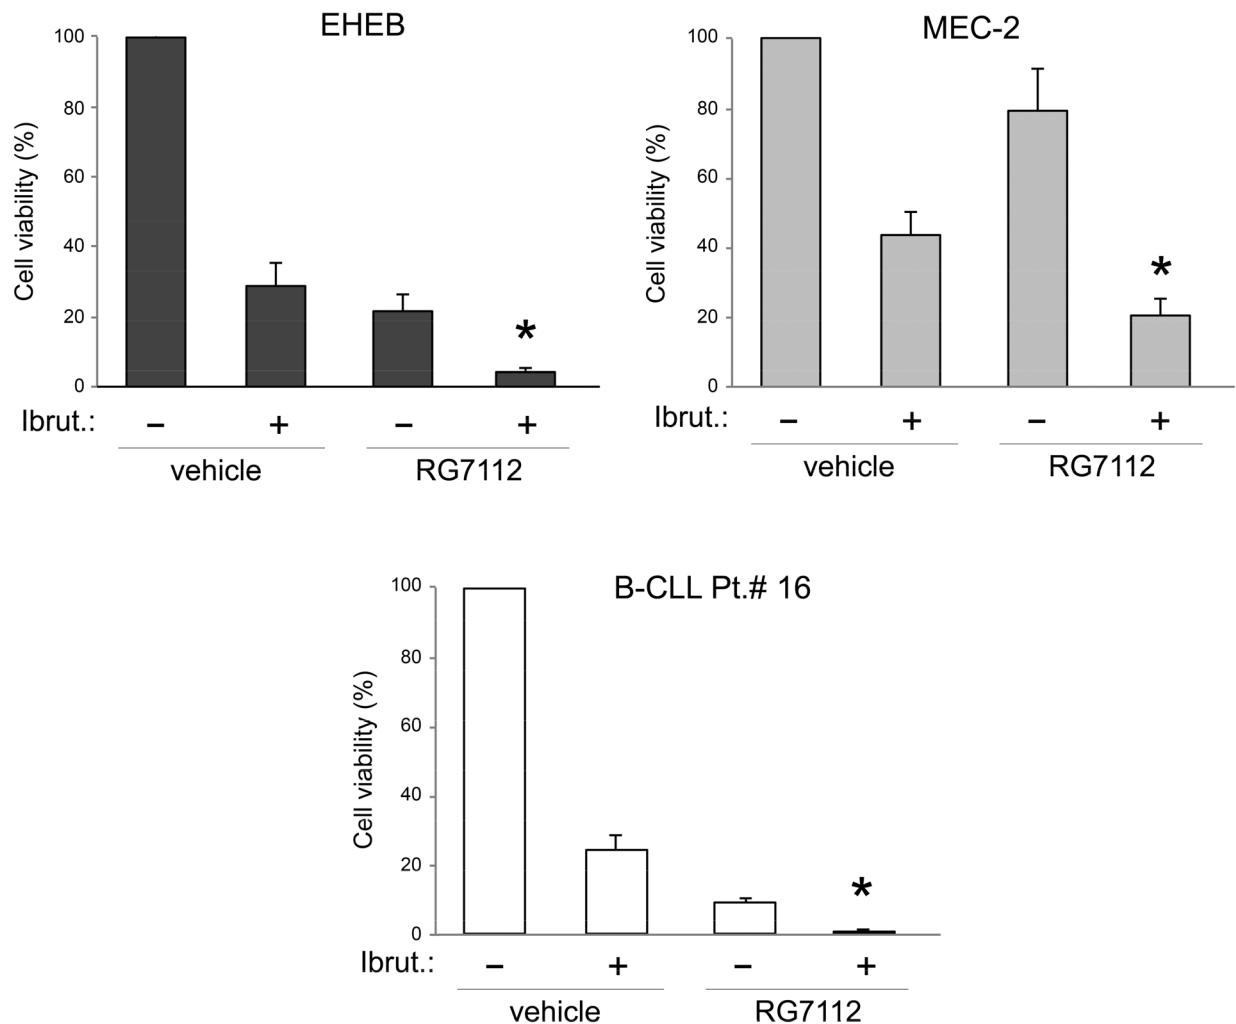

**Supplementary Figure S1: Evaluation of cytotoxic effect in response to Ibrutinib/RG7112 combination in B leukemic cell lines.** The p53<sup>wild-type</sup> EHEB and the p53<sup>mutated</sup> MEC-2 leukemic cells as well as cells of a representative B-CLL patient (Pt.) sample were exposed to Ibrutinib (10  $\mu$ M) and RG7112 (10  $\mu$ M) used either alone or in combination for 48 hours. Cell viability was calculated as percentage with respect to the control untreated cultures (set to 100% for each cell culture). Data are reported as the mean $\pm$ SD of results from at least three independent experiments. The asterisk indicates  $p < 0.05$  respect to single treatments.
